# Supplementary material for: Sinomenine Hydrochloride Ameliorates Fish Foodborne Enteritis via α7nAchR-Mediated Anti-Inflammatory Effect Whilst Altering Microbiota Composition
Source: Front Immunol. 2021 Nov 23;12:766845. doi: 10.3389/fimmu.2021.766845 (PMC8650311; doi:10.3389/fimmu.2021.766845)
Supplement: Supplementary file 2 [file Table_1.xlsx]

## Sheet: Validation of DEGs
Gene	gene description	ORGAN	Primers	Compared	Fold change in qPCR	Fold change in DGE	Log2|Fold change in qPCR|	Log2|Fold change in RNAseq|	R	R^2
pglyrp6	peptidoglycan recognition protein 6 [Source:ZFIN;Acc:ZDB-GENE-071227-2]	GUT	F:5'-AACTCTATTGGCTACGGCG-3'	50SBM VS FM	6.85416	10.3439	2.77698	3.37071	0.86278	0.74439
		GUT	R:5'-TGTTTCCAGGACACTCGGT-3'	SN35 VS FM	1.14702	1.1528	0.197891	0.205146
		GUT		SN35 VS 50SBM	10.1894	9.02236	3.349	3.1735
CYP51	cytochrome P450, family 51 [Source:NCBI gene;Acc:414331]	GUT	F:5'-AAGTTTGCTTACATCCCGTTTGG-3'	SN35 VS 50SBM	3.40178	10.0526	1.76629	3.32949
		GUT	R:5'-GATGGTCTTGATCTGGACGTAGG-3'	SN35 VS FM
MPX	myeloid-specific peroxidase [Source:ZFIN;Acc:ZDB-GENE-030131-9460]	GUT	F:5'-CTACATGGCACAAACGCTGAG-3'	50SBM VS FM	10.9885	15.5095	3.45792	3.95508
		GUT	R:5'-3'CTCGTCTTGAGTGAGCAGGTT
CYP7A1	cytochrome P450, family 7, subfamily A, polypeptide 1 [Source:ZFIN;Acc:ZDB-GENE-040426-1296]	GUT	F:5'-GCAGGCGTGCCAATGTG-3'	50SBM VS FM	3.47984	4.23919	1.92619	3.54473
		GUT	R:5'-CAGCTCGTTGAAGGTAGATAGTGTGT-3'
SIVA1	SIVA1, apoptosis-inducing factor [Source:ZFIN;Acc:ZDB-GENE-050506-57]	GUT	F:5'-CCGCTACCGACAGGAGATCTACGA-3'	50SBM VS FM	24.4798	16.9997	1.79902	2.08379
		GUT	R:5'-GGTGTGGAGCGCGCTCTGTGCAGT-3'
GCK	glucokinase (hexokinase 4) [Source:ZFIN;Acc:ZDB-GENE-060825-204]	GUT	F:5'-GCTGTGAAGTCGGCATGATA-3'	SN35 VS 50SBM	6.37535	8.00041	4.61352	4.08744
		GUT	R:5'-CTTCAACCAGCTCCACCTTAC-3'	SN35 VS FM	11.6711	10.6065	2.6725	3.00007
		GUT		50SBM VS FM	1.50601	1.32922	3.54487	3.40687
CORO1A	coronin, actin binding protein, 1A [Source:ZFIN;Acc:ZDB-GENE-030131-9512]	GUT	F:5'-TGTGATGACTGTGCCTCGTAAG-3'	SN35 VS FM	1.29496	2.01776	0.590729	0.410575
		GUT	R:5'-AATCATCCGCCTCCACTGAT-3'	SN35 VS 50SBM	1.442	9.32489	0.372903	1.01276
				50SBM VS FM	1.39513	4.57892
DAD1	defender against cell death 1 [Source:ZFIN;Acc:ZDB-GENE-060503-233]	GUT	F:5'-GCTGTGTGTCTTCGCATCCA-3'	SN35 VS FM	1.3179	3.21189	0.480401	2.19501
		GUT	R:5'-ACAGTGTGAGCAAAAAGGAAATCA-3'	50SBM VS FM	1.11306	0.833312	0.398241	1.68342
				SN35 VS 50SBM	1.18402	2.7018	0.154536	-0.263071
