# Supplementary material for: Sinomenine Hydrochloride Ameliorates Fish Foodborne Enteritis via α7nAchR-Mediated Anti-Inflammatory Effect Whilst Altering Microbiota Composition
Source: Front Immunol. 2021 Nov 23;12:766845. doi: 10.3389/fimmu.2021.766845 (PMC8650311; doi:10.3389/fimmu.2021.766845)
Supplement: Supplementary file 4 [file Table_3.xlsx]

## Sheet: GO_BP_result
ID	Description	GeneRatio	BgRatio	pvalue	p.adjust	qvalue	geneID	Count
GO:0050830	defense response to Gram-positive bacterium	3/46	25/17011	4.08243e-05	0.00845172	0.00563962	pglyrp6/si:ch211-261n11.7/si:dkey-23c22.9	3
GO:0050714	positive regulation of protein secretion	3/46	26/17011	4.60619e-05	0.00845172	0.00563962	si:ch211-261n11.7/gck/si:dkey-23c22.9	3
GO:0002793	positive regulation of peptide secretion	3/46	27/17011	5.17216e-05	0.00845172	0.00563962	si:ch211-261n11.7/gck/si:dkey-23c22.9	3
GO:0007159	leukocyte cell-cell adhesion	3/46	31/17011	7.88833e-05	0.00845172	0.00563962	si:ch211-261n11.7/si:dkey-23c22.9/podxl2	3
GO:0051250	negative regulation of lymphocyte activation	3/46	32/17011	8.6879e-05	0.00845172	0.00563962	pglyrp6/si:ch211-261n11.7/si:dkey-23c22.9	3
GO:0002695	negative regulation of leukocyte activation	3/46	35/17011	0.000113992	0.00845172	0.00563962	pglyrp6/si:ch211-261n11.7/si:dkey-23c22.9	3
GO:0050866	negative regulation of cell activation	3/46	35/17011	0.000113992	0.00845172	0.00563962	pglyrp6/si:ch211-261n11.7/si:dkey-23c22.9	3
GO:1903532	positive regulation of secretion by cell	3/46	38/17011	0.000146095	0.00915646	0.00610987	si:ch211-261n11.7/gck/si:dkey-23c22.9	3
GO:0051047	positive regulation of secretion	3/46	42/17011	0.000197312	0.00915646	0.00610987	si:ch211-261n11.7/gck/si:dkey-23c22.9	3
GO:0002697	regulation of immune effector process	3/46	43/17011	0.00021171	0.00915646	0.00610987	pglyrp6/si:ch211-261n11.7/si:dkey-23c22.9	3
GO:0051222	positive regulation of protein transport	3/46	43/17011	0.00021171	0.00915646	0.00610987	si:ch211-261n11.7/gck/si:dkey-23c22.9	3
GO:1904951	positive regulation of establishment of protein localization	3/46	43/17011	0.00021171	0.00915646	0.00610987	si:ch211-261n11.7/gck/si:dkey-23c22.9	3
GO:0002702	positive regulation of production of molecular mediator of immune response	2/46	11/17011	0.000387398	0.0142079	0.00948057	si:ch211-261n11.7/si:dkey-23c22.9	2
GO:0002718	regulation of cytokine production involved in immune response	2/46	12/17011	0.000464077	0.0142079	0.00948057	si:ch211-261n11.7/si:dkey-23c22.9	2
GO:0046642	negative regulation of alpha-beta T cell proliferation	2/46	12/17011	0.000464077	0.0142079	0.00948057	si:ch211-261n11.7/si:dkey-23c22.9	2
GO:2000404	regulation of T cell migration	2/46	12/17011	0.000464077	0.0142079	0.00948057	si:ch211-261n11.7/si:dkey-23c22.9	2
GO:0050708	regulation of protein secretion	3/46	58/17011	0.000514534	0.0142079	0.00948057	si:ch211-261n11.7/gck/si:dkey-23c22.9	3
GO:0002367	cytokine production involved in immune response	2/46	13/17011	0.00054751	0.0142079	0.00948057	si:ch211-261n11.7/si:dkey-23c22.9	2
GO:0046640	regulation of alpha-beta T cell proliferation	2/46	13/17011	0.00054751	0.0142079	0.00948057	si:ch211-261n11.7/si:dkey-23c22.9	2
GO:2000401	regulation of lymphocyte migration	2/46	13/17011	0.00054751	0.0142079	0.00948057	si:ch211-261n11.7/si:dkey-23c22.9	2
GO:0002791	regulation of peptide secretion	3/46	61/17011	0.000596753	0.014389	0.00960141	si:ch211-261n11.7/gck/si:dkey-23c22.9	3
GO:0002700	regulation of production of molecular mediator of immune response	2/46	14/17011	0.000637662	0.014389	0.00960141	si:ch211-261n11.7/si:dkey-23c22.9	2
GO:0046633	alpha-beta T cell proliferation	2/46	14/17011	0.000637662	0.014389	0.00960141	si:ch211-261n11.7/si:dkey-23c22.9	2
GO:0002683	negative regulation of immune system process	3/46	67/17011	0.000785367	0.0169836	0.0113327	pglyrp6/si:ch211-261n11.7/si:dkey-23c22.9	3
GO:0072678	T cell migration	2/46	17/17011	0.000948079	0.0187819	0.0125327	si:ch211-261n11.7/si:dkey-23c22.9	2
GO:0051704	multi-organism process	6/46	431/17011	0.00101458	0.0187819	0.0125327	pglyrp6/si:ch211-261n11.7/cyp51/grip2a/nanos3/si:dkey-23c22.9	6
GO:0046636	negative regulation of alpha-beta T cell activation	2/46	18/17011	0.00106475	0.0187819	0.0125327	si:ch211-261n11.7/si:dkey-23c22.9	2
GO:0002699	positive regulation of immune effector process	2/46	19/17011	0.00118797	0.0187819	0.0125327	si:ch211-261n11.7/si:dkey-23c22.9	2
GO:0046634	regulation of alpha-beta T cell activation	2/46	19/17011	0.00118797	0.0187819	0.0125327	si:ch211-261n11.7/si:dkey-23c22.9	2
GO:0050715	positive regulation of cytokine secretion	2/46	19/17011	0.00118797	0.0187819	0.0125327	si:ch211-261n11.7/si:dkey-23c22.9	2
GO:0032945	negative regulation of mononuclear cell proliferation	2/46	20/17011	0.0013177	0.0187819	0.0125327	si:ch211-261n11.7/si:dkey-23c22.9	2
GO:0042130	negative regulation of T cell proliferation	2/46	20/17011	0.0013177	0.0187819	0.0125327	si:ch211-261n11.7/si:dkey-23c22.9	2
GO:0050672	negative regulation of lymphocyte proliferation	2/46	20/17011	0.0013177	0.0187819	0.0125327	si:ch211-261n11.7/si:dkey-23c22.9	2
GO:0050731	positive regulation of peptidyl-tyrosine phosphorylation	2/46	20/17011	0.0013177	0.0187819	0.0125327	si:ch211-261n11.7/si:dkey-23c22.9	2
GO:0050829	defense response to Gram-negative bacterium	2/46	20/17011	0.0013177	0.0187819	0.0125327	si:ch211-261n11.7/si:dkey-23c22.9	2
GO:0070664	negative regulation of leukocyte proliferation	2/46	20/17011	0.0013177	0.0187819	0.0125327	si:ch211-261n11.7/si:dkey-23c22.9	2
GO:0051249	regulation of lymphocyte activation	3/46	81/17011	0.00136229	0.0187819	0.0125327	pglyrp6/si:ch211-261n11.7/si:dkey-23c22.9	3
GO:0051223	regulation of protein transport	3/46	82/17011	0.00141136	0.0187819	0.0125327	si:ch211-261n11.7/gck/si:dkey-23c22.9	3
GO:0070201	regulation of establishment of protein localization	3/46	82/17011	0.00141136	0.0187819	0.0125327	si:ch211-261n11.7/gck/si:dkey-23c22.9	3
GO:0090087	regulation of peptide transport	3/46	85/17011	0.0015652	0.0197287	0.0131645	si:ch211-261n11.7/gck/si:dkey-23c22.9	3
GO:0002687	positive regulation of leukocyte migration	2/46	22/17011	0.00159654	0.0197287	0.0131645	si:ch211-261n11.7/si:dkey-23c22.9	2
GO:0046631	alpha-beta T cell activation	2/46	22/17011	0.00159654	0.0197287	0.0131645	si:ch211-261n11.7/si:dkey-23c22.9	2
GO:0009306	protein secretion	3/46	87/17011	0.00167337	0.0199407	0.0133059	si:ch211-261n11.7/gck/si:dkey-23c22.9	3
GO:0002694	regulation of leukocyte activation	3/46	89/17011	0.00178612	0.0199407	0.0133059	pglyrp6/si:ch211-261n11.7/si:dkey-23c22.9	3
GO:0002790	peptide secretion	3/46	90/17011	0.00184423	0.0199407	0.0133059	si:ch211-261n11.7/gck/si:dkey-23c22.9	3
GO:0009127	purine nucleoside monophosphate biosynthetic process	3/46	90/17011	0.00184423	0.0199407	0.0133059	eno1a/gck/ampd3b	3
GO:0009168	purine ribonucleoside monophosphate biosynthetic process	3/46	90/17011	0.00184423	0.0199407	0.0133059	eno1a/gck/ampd3b	3
GO:0050865	regulation of cell activation	3/46	90/17011	0.00184423	0.0199407	0.0133059	pglyrp6/si:ch211-261n11.7/si:dkey-23c22.9	3
GO:0051050	positive regulation of transport	3/46	97/17011	0.00228423	0.0241942	0.0161442	si:ch211-261n11.7/gck/si:dkey-23c22.9	3
GO:0002440	production of molecular mediator of immune response	2/46	28/17011	0.00258571	0.0258074	0.0172206	si:ch211-261n11.7/si:dkey-23c22.9	2
GO:0050868	negative regulation of T cell activation	2/46	28/17011	0.00258571	0.0258074	0.0172206	si:ch211-261n11.7/si:dkey-23c22.9	2
GO:1903038	negative regulation of leukocyte cell-cell adhesion	2/46	28/17011	0.00258571	0.0258074	0.0172206	si:ch211-261n11.7/si:dkey-23c22.9	2
GO:0009156	ribonucleoside monophosphate biosynthetic process	3/46	103/17011	0.0027091	0.0265288	0.017702	eno1a/gck/ampd3b	3
GO:0009124	nucleoside monophosphate biosynthetic process	3/46	106/17011	0.00293862	0.026924	0.0179657	eno1a/gck/ampd3b	3
GO:0042742	defense response to bacterium	3/46	106/17011	0.00293862	0.026924	0.0179657	pglyrp6/si:ch211-261n11.7/si:dkey-23c22.9	3
GO:1903037	regulation of leukocyte cell-cell adhesion	2/46	30/17011	0.00296541	0.026924	0.0179657	si:ch211-261n11.7/si:dkey-23c22.9	2
GO:0032944	regulation of mononuclear cell proliferation	2/46	31/17011	0.00316448	0.026924	0.0179657	si:ch211-261n11.7/si:dkey-23c22.9	2
GO:0042129	regulation of T cell proliferation	2/46	31/17011	0.00316448	0.026924	0.0179657	si:ch211-261n11.7/si:dkey-23c22.9	2
GO:0050670	regulation of lymphocyte proliferation	2/46	31/17011	0.00316448	0.026924	0.0179657	si:ch211-261n11.7/si:dkey-23c22.9	2
GO:0050730	regulation of peptidyl-tyrosine phosphorylation	2/46	31/17011	0.00316448	0.026924	0.0179657	si:ch211-261n11.7/si:dkey-23c22.9	2
GO:0070663	regulation of leukocyte proliferation	2/46	31/17011	0.00316448	0.026924	0.0179657	si:ch211-261n11.7/si:dkey-23c22.9	2
GO:0042098	T cell proliferation	2/46	33/17011	0.0035809	0.0294217	0.0196324	si:ch211-261n11.7/si:dkey-23c22.9	2
GO:0032943	mononuclear cell proliferation	2/46	34/17011	0.00379818	0.0294217	0.0196324	si:ch211-261n11.7/si:dkey-23c22.9	2
GO:0046651	lymphocyte proliferation	2/46	34/17011	0.00379818	0.0294217	0.0196324	si:ch211-261n11.7/si:dkey-23c22.9	2
GO:0050663	cytokine secretion	2/46	34/17011	0.00379818	0.0294217	0.0196324	si:ch211-261n11.7/si:dkey-23c22.9	2
GO:0050707	regulation of cytokine secretion	2/46	34/17011	0.00379818	0.0294217	0.0196324	si:ch211-261n11.7/si:dkey-23c22.9	2
GO:0070661	leukocyte proliferation	2/46	34/17011	0.00379818	0.0294217	0.0196324	si:ch211-261n11.7/si:dkey-23c22.9	2
GO:0032880	regulation of protein localization	3/46	117/17011	0.00388125	0.0296231	0.0197668	si:ch211-261n11.7/gck/si:dkey-23c22.9	3
GO:0006096	glycolytic process	2/46	36/17011	0.00425072	0.0311737	0.0208014	eno1a/gck	2
GO:0006757	ATP generation from ADP	2/46	36/17011	0.00425072	0.0311737	0.0208014	eno1a/gck	2
GO:0050900	leukocyte migration	3/46	121/17011	0.00426461	0.0311737	0.0208014	si:ch211-261n11.7/si:dkey-23c22.9/podxl2	3
GO:0042866	pyruvate biosynthetic process	2/46	37/17011	0.00448591	0.032336	0.021577	eno1a/gck	2
GO:0046031	ADP metabolic process	2/46	40/17011	0.00522681	0.0355544	0.0237246	eno1a/gck	2
GO:0043207	response to external biotic stimulus	4/46	262/17011	0.00540287	0.0355544	0.0237246	pglyrp6/si:ch211-261n11.7/cyp51/si:dkey-23c22.9	4
GO:0051707	response to other organism	4/46	262/17011	0.00540287	0.0355544	0.0237246	pglyrp6/si:ch211-261n11.7/cyp51/si:dkey-23c22.9	4
GO:0009135	purine nucleoside diphosphate metabolic process	2/46	41/17011	0.00548544	0.0355544	0.0237246	eno1a/gck	2
GO:0009179	purine ribonucleoside diphosphate metabolic process	2/46	41/17011	0.00548544	0.0355544	0.0237246	eno1a/gck	2
GO:0009185	ribonucleoside diphosphate metabolic process	2/46	41/17011	0.00548544	0.0355544	0.0237246	eno1a/gck	2
GO:0050863	regulation of T cell activation	2/46	41/17011	0.00548544	0.0355544	0.0237246	si:ch211-261n11.7/si:dkey-23c22.9	2
GO:0072676	lymphocyte migration	2/46	41/17011	0.00548544	0.0355544	0.0237246	si:ch211-261n11.7/si:dkey-23c22.9	2
GO:0009607	response to biotic stimulus	4/46	264/17011	0.00554896	0.0355544	0.0237246	pglyrp6/si:ch211-261n11.7/cyp51/si:dkey-23c22.9	4
GO:0046649	lymphocyte activation	3/46	134/17011	0.00566621	0.035863	0.0239305	pglyrp6/si:ch211-261n11.7/si:dkey-23c22.9	3
GO:0001819	positive regulation of cytokine production	2/46	42/17011	0.00574984	0.0359538	0.0239911	si:ch211-261n11.7/si:dkey-23c22.9	2
GO:0006165	nucleoside diphosphate phosphorylation	2/46	45/17011	0.00657741	0.040639	0.0271174	eno1a/gck	2
GO:0051049	regulation of transport	5/46	444/17011	0.00673398	0.0411169	0.0274363	si:ch211-261n11.7/gck/si:dkey-23c22.9/zgc:162160/trim9	5
GO:0046939	nucleotide phosphorylation	2/46	46/17011	0.00686462	0.0414272	0.0276433	eno1a/gck	2
GO:0006090	pyruvate metabolic process	2/46	47/17011	0.00715744	0.0426978	0.0284912	eno1a/gck	2
GO:0098542	defense response to other organism	3/46	148/17011	0.00745228	0.0434785	0.0290121	pglyrp6/si:ch211-261n11.7/si:dkey-23c22.9	3
GO:0002685	regulation of leukocyte migration	2/46	48/17011	0.00745586	0.0434785	0.0290121	si:ch211-261n11.7/si:dkey-23c22.9	2
GO:0009126	purine nucleoside monophosphate metabolic process	3/46	151/17011	0.00787354	0.0449051	0.0299641	eno1a/gck/ampd3b	3
GO:0009167	purine ribonucleoside monophosphate metabolic process	3/46	151/17011	0.00787354	0.0449051	0.0299641	eno1a/gck/ampd3b	3
GO:1903530	regulation of secretion by cell	3/46	152/17011	0.00801703	0.0452265	0.0301785	si:ch211-261n11.7/gck/si:dkey-23c22.9	3
GO:0022408	negative regulation of cell-cell adhesion	2/46	51/17011	0.00838433	0.0466922	0.0311565	si:ch211-261n11.7/si:dkey-23c22.9	2
GO:0009152	purine ribonucleotide biosynthetic process	3/46	155/17011	0.00845677	0.0466922	0.0311565	eno1a/gck/ampd3b	3
GO:0009132	nucleoside diphosphate metabolic process	2/46	52/17011	0.00870479	0.0473463	0.031593	eno1a/gck	2
GO:0045321	leukocyte activation	3/46	157/17011	0.00875769	0.0473463	0.031593	pglyrp6/si:ch211-261n11.7/si:dkey-23c22.9	3
GO:0051046	regulation of secretion	3/46	158/17011	0.00891049	0.0476757	0.0318128	si:ch211-261n11.7/gck/si:dkey-23c22.9	3
GO:0002252	immune effector process	3/46	159/17011	0.00906485	0.0477189	0.0318417	pglyrp6/si:ch211-261n11.7/si:dkey-23c22.9	3
GO:0007030	Golgi organization	2/46	54/17011	0.009362	0.0477189	0.0318417	tmed10/ubxn2a	2
GO:0019359	nicotinamide nucleotide biosynthetic process	2/46	54/17011	0.009362	0.0477189	0.0318417	eno1a/gck	2
GO:0019363	pyridine nucleotide biosynthetic process	2/46	54/17011	0.009362	0.0477189	0.0318417	eno1a/gck	2
GO:0006164	purine nucleotide biosynthetic process	3/46	161/17011	0.00937829	0.0477189	0.0318417	eno1a/gck/ampd3b	3
GO:0009166	nucleotide catabolic process	2/46	55/17011	0.00969868	0.04887	0.0326098	eno1a/gck	2
GO:0009161	ribonucleoside monophosphate metabolic process	3/46	164/17011	0.00986025	0.0492065	0.0328342	eno1a/gck/ampd3b	3
GO:0072525	pyridine-containing compound biosynthetic process	2/46	57/17011	0.010388	0.0513466	0.0342623	eno1a/gck	2
GO:0009123	nucleoside monophosphate metabolic process	3/46	168/17011	0.0105251	0.0515331	0.0343867	eno1a/gck/ampd3b	3
GO:0009260	ribonucleotide biosynthetic process	3/46	169/17011	0.0106952	0.0516149	0.0344413	eno1a/gck/ampd3b	3
GO:1901292	nucleoside phosphate catabolic process	2/46	58/17011	0.0107407	0.0516149	0.0344413	eno1a/gck	2
GO:0046390	ribose phosphate biosynthetic process	3/46	172/17011	0.0112154	0.0534017	0.0356336	eno1a/gck/ampd3b	3
GO:0072522	purine-containing compound biosynthetic process	3/46	173/17011	0.011392	0.0537495	0.0358657	eno1a/gck/ampd3b	3
GO:0001775	cell activation	3/46	177/17011	0.0121145	0.0560494	0.0374003	pglyrp6/si:ch211-261n11.7/si:dkey-23c22.9	3
GO:0006754	ATP biosynthetic process	2/46	62/17011	0.0122034	0.0560494	0.0374003	eno1a/gck	2
GO:0018108	peptidyl-tyrosine phosphorylation	2/46	62/17011	0.0122034	0.0560494	0.0374003	si:ch211-261n11.7/si:dkey-23c22.9	2
GO:0022407	regulation of cell-cell adhesion	2/46	64/17011	0.0129657	0.0590282	0.0393881	si:ch211-261n11.7/si:dkey-23c22.9	2
GO:0001817	regulation of cytokine production	2/46	65/17011	0.0133545	0.0592393	0.0395289	si:ch211-261n11.7/si:dkey-23c22.9	2
GO:0007162	negative regulation of cell adhesion	2/46	65/17011	0.0133545	0.0592393	0.0395289	si:ch211-261n11.7/si:dkey-23c22.9	2
GO:0018212	peptidyl-tyrosine modification	2/46	65/17011	0.0133545	0.0592393	0.0395289	si:ch211-261n11.7/si:dkey-23c22.9	2
GO:0009617	response to bacterium	3/46	187/17011	0.0140343	0.0617273	0.0411891	pglyrp6/si:ch211-261n11.7/si:dkey-23c22.9	3
GO:0050776	regulation of immune response	3/46	192/17011	0.0150556	0.0656628	0.0438152	pglyrp6/si:ch211-261n11.7/si:dkey-23c22.9	3
GO:0016052	carbohydrate catabolic process	2/46	70/17011	0.0153737	0.0664911	0.0443678	eno1a/gck	2
GO:0019362	pyridine nucleotide metabolic process	2/46	72/17011	0.0162159	0.0689838	0.0460312	eno1a/gck	2
GO:0046496	nicotinamide nucleotide metabolic process	2/46	72/17011	0.0162159	0.0689838	0.0460312	eno1a/gck	2
GO:0009145	purine nucleoside triphosphate biosynthetic process	2/46	73/17011	0.0166442	0.0696642	0.0464852	eno1a/gck	2
GO:0009206	purine ribonucleoside triphosphate biosynthetic process	2/46	73/17011	0.0166442	0.0696642	0.0464852	eno1a/gck	2
GO:0061025	membrane fusion	2/46	74/17011	0.0170774	0.0709055	0.0473135	ubxn2a/trim9	2
GO:0072524	pyridine-containing compound metabolic process	2/46	75/17011	0.0175154	0.0716096	0.0477833	eno1a/gck	2
GO:0017144	drug metabolic process	4/46	370/17011	0.017523	0.0716096	0.0477833	eno1a/gck/ampd3b/hgd	4
GO:0001816	cytokine production	2/46	76/17011	0.0179582	0.0722505	0.0482109	si:ch211-261n11.7/si:dkey-23c22.9	2
GO:0042110	T cell activation	2/46	76/17011	0.0179582	0.0722505	0.0482109	si:ch211-261n11.7/si:dkey-23c22.9	2
GO:0030334	regulation of cell migration	3/46	207/17011	0.0183675	0.0733288	0.0489305	si:ch211-261n11.7/thy1/si:dkey-23c22.9	3
GO:0009165	nucleotide biosynthetic process	3/46	214/17011	0.0200412	0.0793998	0.0529815	eno1a/gck/ampd3b	3
GO:0009201	ribonucleoside triphosphate biosynthetic process	2/46	82/17011	0.0207133	0.0811027	0.0541178	eno1a/gck	2
GO:1901293	nucleoside phosphate biosynthetic process	3/46	217/17011	0.0207835	0.0811027	0.0541178	eno1a/gck/ampd3b	3
GO:0008285	negative regulation of cell proliferation	2/46	84/17011	0.0216686	0.0839254	0.0560013	si:ch211-261n11.7/si:dkey-23c22.9	2
GO:2000145	regulation of cell motility	3/46	222/17011	0.0220543	0.0847864	0.0565759	si:ch211-261n11.7/thy1/si:dkey-23c22.9	3
GO:0009142	nucleoside triphosphate biosynthetic process	2/46	88/17011	0.0236331	0.0901881	0.0601803	eno1a/gck	2
GO:0006733	oxidoreduction coenzyme metabolic process	2/46	89/17011	0.0241353	0.0907699	0.0605685	eno1a/gck	2
GO:0030335	positive regulation of cell migration	2/46	89/17011	0.0241353	0.0907699	0.0605685	si:ch211-261n11.7/si:dkey-23c22.9	2
GO:0046434	organophosphate catabolic process	2/46	93/17011	0.0261879	0.0963092	0.0642647	eno1a/gck	2
GO:0034404	nucleobase-containing small molecule biosynthetic process	2/46	94/17011	0.0267118	0.0963092	0.0642647	eno1a/gck	2
GO:0006312	mitotic recombination	1/46	10/17011	0.0267216	0.0963092	0.0642647	dmc1	1
GO:0032261	purine nucleotide salvage	1/46	10/17011	0.0267216	0.0963092	0.0642647	ampd3b	1
GO:0035418	protein localization to synapse	1/46	10/17011	0.0267216	0.0963092	0.0642647	grip2a	1
GO:0045620	negative regulation of lymphocyte differentiation	1/46	10/17011	0.0267216	0.0963092	0.0642647	pglyrp6	1
GO:2000147	positive regulation of cell motility	2/46	95/17011	0.0272399	0.0975001	0.0650594	si:ch211-261n11.7/si:dkey-23c22.9	2
GO:0022412	cellular process involved in reproduction in multicellular organism	2/46	96/17011	0.0277723	0.0976589	0.0651654	grip2a/nanos3	2
GO:0051272	positive regulation of cellular component movement	2/46	96/17011	0.0277723	0.0976589	0.0651654	si:ch211-261n11.7/si:dkey-23c22.9	2
GO:0051270	regulation of cellular component movement	3/46	243/17011	0.0278488	0.0976589	0.0651654	si:ch211-261n11.7/thy1/si:dkey-23c22.9	3
GO:0040012	regulation of locomotion	3/46	247/17011	0.0290362	0.100232	0.0668823	si:ch211-261n11.7/thy1/si:dkey-23c22.9	3
GO:0000731	DNA synthesis involved in DNA repair	1/46	11/17011	0.029355	0.100232	0.0668823	pold3	1
GO:0031468	nuclear envelope reassembly	1/46	11/17011	0.029355	0.100232	0.0668823	ubxn2a	1
GO:0034644	cellular response to UV	1/46	11/17011	0.029355	0.100232	0.0668823	pold3	1
GO:0040017	positive regulation of locomotion	2/46	100/17011	0.0299436	0.101574	0.0677775	si:ch211-261n11.7/si:dkey-23c22.9	2
GO:0022414	reproductive process	3/46	255/17011	0.0314911	0.104849	0.0699634	dmc1/grip2a/nanos3	3
GO:0001678	cellular glucose homeostasis	1/46	12/17011	0.0319815	0.104849	0.0699634	gck	1
GO:0030259	lipid glycosylation	1/46	12/17011	0.0319815	0.104849	0.0699634	b4galnt2.2	1
GO:0031338	regulation of vesicle fusion	1/46	12/17011	0.0319815	0.104849	0.0699634	trim9	1
GO:1902106	negative regulation of leukocyte differentiation	1/46	12/17011	0.0319815	0.104849	0.0699634	pglyrp6	1
GO:0009150	purine ribonucleotide metabolic process	3/46	257/17011	0.0321215	0.104849	0.0699634	eno1a/gck/ampd3b	3
GO:0000003	reproduction	3/46	259/17011	0.0327585	0.105601	0.0704646	dmc1/grip2a/nanos3	3
GO:0019439	aromatic compound catabolic process	3/46	259/17011	0.0327585	0.105601	0.0704646	eno1a/gck/hgd	3
GO:0032940	secretion by cell	3/46	264/17011	0.0343801	0.110144	0.0734962	si:ch211-261n11.7/gck/si:dkey-23c22.9	3
GO:1990126	retrograde transport, endosome to plasma membrane	1/46	13/17011	0.034601	0.110171	0.0735145	grip2a	1
GO:0006163	purine nucleotide metabolic process	3/46	267/17011	0.0353729	0.111942	0.0746963	eno1a/gck/ampd3b	3
GO:0009259	ribonucleotide metabolic process	3/46	272/17011	0.0370605	0.116348	0.0776364	eno1a/gck/ampd3b	3
GO:0018149	peptide cross-linking	1/46	14/17011	0.0372136	0.116348	0.0776364	f13a1a.1	1
GO:0030155	regulation of cell adhesion	2/46	114/17011	0.0380499	0.11768	0.0785247	si:ch211-261n11.7/si:dkey-23c22.9	2
GO:1901361	organic cyclic compound catabolic process	3/46	275/17011	0.0380928	0.11768	0.0785247	eno1a/gck/hgd	3
GO:0006188	IMP biosynthetic process	1/46	15/17011	0.0398192	0.120152	0.0801745	ampd3b	1
GO:0008354	germ cell migration	1/46	15/17011	0.0398192	0.120152	0.0801745	grip2a	1
GO:0043101	purine-containing compound salvage	1/46	15/17011	0.0398192	0.120152	0.0801745	ampd3b	1
GO:0046033	AMP metabolic process	1/46	15/17011	0.0398192	0.120152	0.0801745	ampd3b	1
GO:1901137	carbohydrate derivative biosynthetic process	4/46	482/17011	0.0407635	0.121629	0.0811602	eno1a/gck/ampd3b/st6galnac1.2	4
GO:0072330	monocarboxylic acid biosynthetic process	2/46	119/17011	0.041127	0.121629	0.0811602	eno1a/gck	2
GO:0019693	ribose phosphate metabolic process	3/46	284/17011	0.041278	0.121629	0.0811602	eno1a/gck/ampd3b	3
GO:0046903	secretion	3/46	284/17011	0.041278	0.121629	0.0811602	si:ch211-261n11.7/gck/si:dkey-23c22.9	3
GO:0046034	ATP metabolic process	2/46	121/17011	0.0423835	0.121629	0.0811602	eno1a/gck	2
GO:0006026	aminoglycan catabolic process	1/46	16/17011	0.0424179	0.121629	0.0811602	pglyrp6	1
GO:0006271	DNA strand elongation involved in DNA replication	1/46	16/17011	0.0424179	0.121629	0.0811602	pold3	1
GO:0019730	antimicrobial humoral response	1/46	16/17011	0.0424179	0.121629	0.0811602	pglyrp6	1
GO:0019827	stem cell population maintenance	1/46	16/17011	0.0424179	0.121629	0.0811602	nanos3	1
GO:0002698	negative regulation of immune effector process	1/46	17/17011	0.0450098	0.127651	0.0851782	pglyrp6	1
GO:0051180	vitamin transport	1/46	17/17011	0.0450098	0.127651	0.0851782	gc	1
GO:0072521	purine-containing compound metabolic process	3/46	299/17011	0.0468781	0.130697	0.0872108	eno1a/gck/ampd3b	3
GO:0006364	rRNA processing	2/46	128/17011	0.0468934	0.130697	0.0872108	c1d/imp3	2
GO:0002285	lymphocyte activation involved in immune response	1/46	18/17011	0.0475948	0.130697	0.0872108	pglyrp6	1
GO:0022616	DNA strand elongation	1/46	18/17011	0.0475948	0.130697	0.0872108	pold3	1
GO:0046040	IMP metabolic process	1/46	18/17011	0.0475948	0.130697	0.0872108	ampd3b	1
GO:0098727	maintenance of cell number	1/46	18/17011	0.0475948	0.130697	0.0872108	nanos3	1
GO:0009108	coenzyme biosynthetic process	2/46	130/17011	0.0482131	0.131698	0.0878788	eno1a/gck	2
GO:0021952	central nervous system projection neuron axonogenesis	1/46	19/17011	0.050173	0.134137	0.0895062	coro1a	1
GO:0043173	nucleotide salvage	1/46	19/17011	0.050173	0.134137	0.0895062	ampd3b	1
GO:0099632	protein transport within plasma membrane	1/46	19/17011	0.050173	0.134137	0.0895062	grip2a	1
GO:0099637	neurotransmitter receptor transport	1/46	19/17011	0.050173	0.134137	0.0895062	grip2a	1
GO:0098609	cell-cell adhesion	3/46	308/17011	0.0504107	0.134137	0.0895062	si:ch211-261n11.7/si:dkey-23c22.9/podxl2	3
GO:0007276	gamete generation	2/46	136/17011	0.0522532	0.134137	0.0895062	grip2a/nanos3	2
GO:0030258	lipid modification	2/46	136/17011	0.0522532	0.134137	0.0895062	mtmr1b/b4galnt2.2	2
GO:0051186	cofactor metabolic process	3/46	313/17011	0.0524284	0.134137	0.0895062	eno1a/gck/mrps36	3
GO:0009074	aromatic amino acid family catabolic process	1/46	20/17011	0.0527443	0.134137	0.0895062	hgd	1
GO:0045619	regulation of lymphocyte differentiation	1/46	20/17011	0.0527443	0.134137	0.0895062	pglyrp6	1
GO:0050777	negative regulation of immune response	1/46	20/17011	0.0527443	0.134137	0.0895062	pglyrp6	1
GO:1903707	negative regulation of hemopoiesis	1/46	20/17011	0.0527443	0.134137	0.0895062	pglyrp6	1
GO:1990798	pancreas regeneration	1/46	20/17011	0.0527443	0.134137	0.0895062	gck	1
GO:0009205	purine ribonucleoside triphosphate metabolic process	2/46	138/17011	0.0536262	0.134137	0.0895062	eno1a/gck	2
GO:0048609	multicellular organismal reproductive process	2/46	138/17011	0.0536262	0.134137	0.0895062	grip2a/nanos3	2
GO:0032504	multicellular organism reproduction	2/46	139/17011	0.0543175	0.134137	0.0895062	grip2a/nanos3	2
GO:0009144	purine nucleoside triphosphate metabolic process	2/46	140/17011	0.055012	0.134137	0.0895062	eno1a/gck	2
GO:0003323	type B pancreatic cell development	1/46	21/17011	0.0553088	0.134137	0.0895062	gck	1
GO:0006695	cholesterol biosynthetic process	1/46	21/17011	0.0553088	0.134137	0.0895062	cyp51	1
GO:0006998	nuclear envelope organization	1/46	21/17011	0.0553088	0.134137	0.0895062	ubxn2a	1
GO:0009411	response to UV	1/46	21/17011	0.0553088	0.134137	0.0895062	pold3	1
GO:0032594	protein transport within lipid bilayer	1/46	21/17011	0.0553088	0.134137	0.0895062	grip2a	1
GO:0050796	regulation of insulin secretion	1/46	21/17011	0.0553088	0.134137	0.0895062	gck	1
GO:1902653	secondary alcohol biosynthetic process	1/46	21/17011	0.0553088	0.134137	0.0895062	cyp51	1
GO:0016072	rRNA metabolic process	2/46	142/17011	0.0564105	0.136172	0.0908645	c1d/imp3	2
GO:0007019	microtubule depolymerization	1/46	22/17011	0.0578666	0.1384	0.0923507	stmn1a	1
GO:0031100	animal organ regeneration	1/46	22/17011	0.0578666	0.1384	0.0923507	gck	1
GO:0002682	regulation of immune system process	3/46	327/17011	0.0582847	0.13876	0.0925913	pglyrp6/si:ch211-261n11.7/si:dkey-23c22.9	3
GO:0061024	membrane organization	3/46	330/17011	0.0595787	0.141193	0.0942148	grip2a/ubxn2a/trim9	3
GO:0009199	ribonucleoside triphosphate metabolic process	2/46	147/17011	0.0599613	0.141246	0.0942502	eno1a/gck	2
GO:0002068	glandular epithelial cell development	1/46	23/17011	0.0604175	0.141246	0.0942502	gck	1
GO:0021955	central nervous system neuron axonogenesis	1/46	23/17011	0.0604175	0.141246	0.0942502	coro1a	1
GO:0001878	response to yeast	1/46	24/17011	0.0629617	0.144589	0.0964807	cyp51	1
GO:0007131	reciprocal meiotic recombination	1/46	24/17011	0.0629617	0.144589	0.0964807	dmc1	1
GO:0061951	establishment of protein localization to plasma membrane	1/46	24/17011	0.0629617	0.144589	0.0964807	grip2a	1
GO:0090276	regulation of peptide hormone secretion	1/46	24/17011	0.0629617	0.144589	0.0964807	gck	1
GO:0035825	homologous recombination	1/46	25/17011	0.0654992	0.149097	0.0994886	dmc1	1
GO:0048599	oocyte development	1/46	25/17011	0.0654992	0.149097	0.0994886	nanos3	1
GO:0090407	organophosphate biosynthetic process	3/46	344/17011	0.0657969	0.14912	0.0995043	eno1a/gck/ampd3b	3
GO:0009141	nucleoside triphosphate metabolic process	2/46	157/17011	0.067287	0.150257	0.100263	eno1a/gck	2
GO:0002366	leukocyte activation involved in immune response	1/46	26/17011	0.0680299	0.150257	0.100263	pglyrp6	1
GO:0009994	oocyte differentiation	1/46	26/17011	0.0680299	0.150257	0.100263	nanos3	1
GO:0046856	phosphatidylinositol dephosphorylation	1/46	26/17011	0.0680299	0.150257	0.100263	mtmr1b	1
GO:0019953	sexual reproduction	2/46	158/17011	0.0680354	0.150257	0.100263	grip2a/nanos3	2
GO:0051188	cofactor biosynthetic process	2/46	158/17011	0.0680354	0.150257	0.100263	eno1a/gck	2
GO:0044703	multi-organism reproductive process	2/46	160/17011	0.0695406	0.15293	0.102047	grip2a/nanos3	2
GO:0009117	nucleotide metabolic process	3/46	353/17011	0.0699475	0.153176	0.102211	eno1a/gck/ampd3b	3
GO:0002263	cell activation involved in immune response	1/46	27/17011	0.0705539	0.153211	0.102234	pglyrp6	1
GO:0099072	regulation of postsynaptic membrane neurotransmitter receptor levels	1/46	27/17011	0.0705539	0.153211	0.102234	grip2a	1
GO:0050778	positive regulation of immune response	2/46	163/17011	0.0718191	0.154688	0.103219	si:ch211-261n11.7/si:dkey-23c22.9	2
GO:0006753	nucleoside phosphate metabolic process	3/46	357/17011	0.0718301	0.154688	0.103219	eno1a/gck/ampd3b	3
GO:0010256	endomembrane system organization	2/46	167/17011	0.0748948	0.160284	0.106953	tmed10/ubxn2a	2
GO:0009072	aromatic amino acid family metabolic process	1/46	29/17011	0.0755819	0.160284	0.106953	hgd	1
GO:0009620	response to fungus	1/46	29/17011	0.0755819	0.160284	0.106953	cyp51	1
GO:0006952	defense response	3/46	365/17011	0.0756639	0.160284	0.106953	pglyrp6/si:ch211-261n11.7/si:dkey-23c22.9	3
GO:0030073	insulin secretion	1/46	30/17011	0.0780859	0.164075	0.109483	gck	1
GO:0043094	cellular metabolic compound salvage	1/46	30/17011	0.0780859	0.164075	0.109483	ampd3b	1
GO:0044283	small molecule biosynthetic process	3/46	372/17011	0.0790926	0.16552	0.110448	eno1a/gck/cyp51	3
GO:0003309	type B pancreatic cell differentiation	1/46	32/17011	0.0830741	0.172462	0.115079	gck	1
GO:1902105	regulation of leukocyte differentiation	1/46	32/17011	0.0830741	0.172462	0.115079	pglyrp6	1
GO:0097120	receptor localization to synapse	1/46	33/17011	0.0855583	0.176911	0.118049	grip2a	1
GO:0006091	generation of precursor metabolites and energy	2/46	181/17011	0.0859826	0.177083	0.118163	eno1a/gck	2
GO:0002066	columnar/cuboidal epithelial cell development	1/46	34/17011	0.0880358	0.178849	0.119341	gck	1
GO:0031110	regulation of microtubule polymerization or depolymerization	1/46	34/17011	0.0880358	0.178849	0.119341	stmn1a	1
GO:0046883	regulation of hormone secretion	1/46	34/17011	0.0880358	0.178849	0.119341	gck	1
GO:0006974	cellular response to DNA damage stimulus	3/46	390/17011	0.0882183	0.178849	0.119341	dmc1/zbtb11/pold3	3
GO:0002067	glandular epithelial cell differentiation	1/46	35/17011	0.0905068	0.180666	0.120554	gck	1
GO:0016126	sterol biosynthetic process	1/46	35/17011	0.0905068	0.180666	0.120554	cyp51	1
GO:0030072	peptide hormone secretion	1/46	35/17011	0.0905068	0.180666	0.120554	gck	1
GO:0035883	enteroendocrine cell differentiation	1/46	35/17011	0.0905068	0.180666	0.120554	gck	1
GO:0006289	nucleotide-excision repair	1/46	36/17011	0.0929713	0.184874	0.123362	pold3	1
GO:0006997	nucleus organization	1/46	37/17011	0.0954292	0.188319	0.12566	ubxn2a	1
GO:0071897	DNA biosynthetic process	1/46	37/17011	0.0954292	0.188319	0.12566	pold3	1
GO:0007127	meiosis I	1/46	38/17011	0.0978806	0.192424	0.1284	dmc1	1
GO:0042254	ribosome biogenesis	2/46	197/17011	0.0992194	0.19359	0.129178	c1d/imp3	2
GO:0070085	glycosylation	2/46	197/17011	0.0992194	0.19359	0.129178	b4galnt2.2/st6galnac1.2	2
GO:0046839	phospholipid dephosphorylation	1/46	39/17011	0.100326	0.195015	0.130129	mtmr1b	1
GO:0046394	carboxylic acid biosynthetic process	2/46	199/17011	0.100913	0.195425	0.130402	eno1a/gck	2
GO:0016053	organic acid biosynthetic process	2/46	201/17011	0.102615	0.196806	0.131324	eno1a/gck	2
GO:0033500	carbohydrate homeostasis	1/46	40/17011	0.102764	0.196806	0.131324	gck	1
GO:0042593	glucose homeostasis	1/46	40/17011	0.102764	0.196806	0.131324	gck	1
GO:0006732	coenzyme metabolic process	2/46	203/17011	0.104325	0.199061	0.132828	eno1a/gck	2
GO:0030203	glycosaminoglycan metabolic process	1/46	41/17011	0.105196	0.199258	0.13296	pglyrp6	1
GO:0046879	hormone secretion	1/46	41/17011	0.105196	0.199258	0.13296	gck	1
GO:0055086	nucleobase-containing small molecule metabolic process	3/46	423/17011	0.106048	0.200141	0.133549	eno1a/gck/ampd3b	3
GO:0043648	dicarboxylic acid metabolic process	1/46	42/17011	0.107621	0.201193	0.134251	mrps36	1
GO:0051091	positive regulation of DNA-binding transcription factor activity	1/46	42/17011	0.107621	0.201193	0.134251	pprc1	1
GO:0002684	positive regulation of immune system process	2/46	207/17011	0.107768	0.201193	0.134251	si:ch211-261n11.7/si:dkey-23c22.9	2
GO:0009914	hormone transport	1/46	43/17011	0.110041	0.204699	0.136591	gck	1
GO:0034655	nucleobase-containing compound catabolic process	2/46	211/17011	0.111242	0.206195	0.137589	eno1a/gck	2
GO:0021954	central nervous system neuron development	1/46	44/17011	0.112453	0.206962	0.1381	coro1a	1
GO:0061982	meiosis I cell cycle process	1/46	44/17011	0.112453	0.206962	0.1381	dmc1	1
GO:0000045	autophagosome assembly	1/46	46/17011	0.117259	0.213535	0.142487	ubxn2a	1
GO:0031333	negative regulation of protein complex assembly	1/46	46/17011	0.117259	0.213535	0.142487	trim9	1
GO:1905037	autophagosome organization	1/46	46/17011	0.117259	0.213535	0.142487	ubxn2a	1
GO:0032787	monocarboxylic acid metabolic process	2/46	220/17011	0.119166	0.216249	0.144297	eno1a/gck	2
GO:0010951	negative regulation of endopeptidase activity	1/46	47/17011	0.119653	0.216376	0.144382	kng1	1
GO:0008203	cholesterol metabolic process	1/46	48/17011	0.12204	0.21841	0.145739	cyp51	1
GO:0031146	SCF-dependent proteasomal ubiquitin-dependent protein catabolic process	1/46	48/17011	0.12204	0.21841	0.145739	cul5a	1
GO:0098876	vesicle-mediated transport to the plasma membrane	1/46	48/17011	0.12204	0.21841	0.145739	grip2a	1
GO:0048477	oogenesis	1/46	49/17011	0.124421	0.221145	0.147565	nanos3	1
GO:1902652	secondary alcohol metabolic process	1/46	49/17011	0.124421	0.221145	0.147565	cyp51	1
GO:0043161	proteasome-mediated ubiquitin-dependent protein catabolic process	2/46	227/17011	0.125426	0.22217	0.148249	ubxn2a/cul5a	2
GO:0071482	cellular response to light stimulus	1/46	50/17011	0.126795	0.223833	0.149358	pold3	1
GO:0031109	microtubule polymerization or depolymerization	1/46	51/17011	0.129164	0.22724	0.151632	stmn1a	1
GO:0051051	negative regulation of transport	1/46	52/17011	0.131526	0.229838	0.153365	trim9	1
GO:0140013	meiotic nuclear division	1/46	52/17011	0.131526	0.229838	0.153365	dmc1	1
GO:1990573	potassium ion import across plasma membrane	1/46	53/17011	0.133881	0.233169	0.155588	zgc:162160	1
GO:0007292	female gamete generation	1/46	54/17011	0.136231	0.236467	0.157789	nanos3	1
GO:0010466	negative regulation of peptidase activity	1/46	55/17011	0.138574	0.238936	0.159436	kng1	1
GO:0030098	lymphocyte differentiation	1/46	55/17011	0.138574	0.238936	0.159436	pglyrp6	1
GO:0010498	proteasomal protein catabolic process	2/46	242/17011	0.139099	0.239047	0.15951	ubxn2a/cul5a	2
GO:0007596	blood coagulation	1/46	56/17011	0.140911	0.240882	0.160735	f13a1a.1	1
GO:0006955	immune response	3/46	482/17011	0.141095	0.240882	0.160735	pglyrp6/si:ch211-261n11.7/si:dkey-23c22.9	3
GO:0044270	cellular nitrogen compound catabolic process	2/46	246/17011	0.1428	0.241371	0.161061	eno1a/gck	2
GO:0006906	vesicle fusion	1/46	57/17011	0.143242	0.241371	0.161061	trim9	1
GO:0007599	hemostasis	1/46	57/17011	0.143242	0.241371	0.161061	f13a1a.1	1
GO:0010107	potassium ion import	1/46	57/17011	0.143242	0.241371	0.161061	zgc:162160	1
GO:0034470	ncRNA processing	2/46	248/17011	0.144659	0.242922	0.162096	c1d/imp3	2
GO:0033334	fin morphogenesis	1/46	58/17011	0.145566	0.242922	0.162096	grip2a	1
GO:0051668	localization within membrane	1/46	58/17011	0.145566	0.242922	0.162096	grip2a	1
GO:0046700	heterocycle catabolic process	2/46	250/17011	0.146523	0.243657	0.162587	eno1a/gck	2
GO:0050817	coagulation	1/46	59/17011	0.147885	0.243657	0.162587	f13a1a.1	1
GO:0051090	regulation of DNA-binding transcription factor activity	1/46	59/17011	0.147885	0.243657	0.162587	pprc1	1
GO:0090174	organelle membrane fusion	1/46	59/17011	0.147885	0.243657	0.162587	trim9	1
GO:0002065	columnar/cuboidal epithelial cell differentiation	1/46	61/17011	0.152503	0.248116	0.165562	gck	1
GO:0035107	appendage morphogenesis	1/46	61/17011	0.152503	0.248116	0.165562	grip2a	1
GO:0051261	protein depolymerization	1/46	61/17011	0.152503	0.248116	0.165562	stmn1a	1
GO:0071478	cellular response to radiation	1/46	61/17011	0.152503	0.248116	0.165562	pold3	1
GO:0016125	sterol metabolic process	1/46	62/17011	0.154803	0.251071	0.167533	cyp51	1
GO:0006694	steroid biosynthetic process	1/46	63/17011	0.157097	0.253998	0.169486	cyp51	1
GO:0051240	positive regulation of multicellular organismal process	2/46	262/17011	0.157811	0.25436	0.169728	si:ch211-261n11.7/si:dkey-23c22.9	2
GO:0006022	aminoglycan metabolic process	1/46	65/17011	0.161666	0.259767	0.173336	pglyrp6	1
GO:0045861	negative regulation of proteolysis	1/46	66/17011	0.163942	0.262611	0.175234	kng1	1
GO:0001934	positive regulation of protein phosphorylation	2/46	269/17011	0.164472	0.26265	0.17526	si:ch211-261n11.7/si:dkey-23c22.9	2
GO:1903046	meiotic cell cycle process	1/46	67/17011	0.166212	0.264613	0.17657	dmc1	1
GO:0042127	regulation of cell proliferation	2/46	273/17011	0.168302	0.266307	0.1777	si:ch211-261n11.7/si:dkey-23c22.9	2
GO:0042327	positive regulation of phosphorylation	2/46	273/17011	0.168302	0.266307	0.1777	si:ch211-261n11.7/si:dkey-23c22.9	2
GO:0072659	protein localization to plasma membrane	1/46	69/17011	0.170733	0.269332	0.179719	grip2a	1
GO:0098659	inorganic cation import across plasma membrane	1/46	70/17011	0.172984	0.271235	0.180989	zgc:162160	1
GO:0099587	inorganic ion import across plasma membrane	1/46	70/17011	0.172984	0.271235	0.180989	zgc:162160	1
GO:0000724	double-strand break repair via homologous recombination	1/46	71/17011	0.17523	0.273234	0.182322	dmc1	1
GO:0000725	recombinational repair	1/46	72/17011	0.17747	0.273234	0.182322	dmc1	1
GO:0031018	endocrine pancreas development	1/46	72/17011	0.17747	0.273234	0.182322	gck	1
GO:0070507	regulation of microtubule cytoskeleton organization	1/46	72/17011	0.17747	0.273234	0.182322	stmn1a	1
GO:0072376	protein activation cascade	1/46	72/17011	0.17747	0.273234	0.182322	f13a1a.1	1
GO:0010562	positive regulation of phosphorus metabolic process	2/46	283/17011	0.177944	0.273234	0.182322	si:ch211-261n11.7/si:dkey-23c22.9	2
GO:0045937	positive regulation of phosphate metabolic process	2/46	283/17011	0.177944	0.273234	0.182322	si:ch211-261n11.7/si:dkey-23c22.9	2
GO:0050878	regulation of body fluid levels	1/46	73/17011	0.179703	0.273507	0.182505	f13a1a.1	1
GO:0071214	cellular response to abiotic stimulus	1/46	73/17011	0.179703	0.273507	0.182505	pold3	1
GO:0104004	cellular response to environmental stimulus	1/46	73/17011	0.179703	0.273507	0.182505	pold3	1
GO:0006281	DNA repair	2/46	286/17011	0.180855	0.274455	0.183137	dmc1/pold3	2
GO:0048284	organelle fusion	1/46	74/17011	0.181931	0.274483	0.183156	trim9	1
GO:0051346	negative regulation of hydrolase activity	1/46	74/17011	0.181931	0.274483	0.183156	kng1	1
GO:0016236	macroautophagy	1/46	75/17011	0.184153	0.275433	0.18379	ubxn2a	1
GO:0098739	import across plasma membrane	1/46	75/17011	0.184153	0.275433	0.18379	zgc:162160	1
GO:1901606	alpha-amino acid catabolic process	1/46	75/17011	0.184153	0.275433	0.18379	hgd	1
GO:0046165	alcohol biosynthetic process	1/46	77/17011	0.188579	0.281243	0.187666	cyp51	1
GO:0007281	germ cell development	1/46	78/17011	0.190783	0.282098	0.188237	nanos3	1
GO:0032886	regulation of microtubule-based process	1/46	78/17011	0.190783	0.282098	0.188237	stmn1a	1
GO:1903706	regulation of hemopoiesis	1/46	78/17011	0.190783	0.282098	0.188237	pglyrp6	1
GO:0032482	Rab protein signal transduction	1/46	79/17011	0.192981	0.284538	0.189865	zgc:162879	1
GO:0007033	vacuole organization	1/46	80/17011	0.195174	0.286145	0.190937	ubxn2a	1
GO:1901136	carbohydrate derivative catabolic process	1/46	80/17011	0.195174	0.286145	0.190937	pglyrp6	1
GO:0022613	ribonucleoprotein complex biogenesis	2/46	302/17011	0.196498	0.287274	0.191691	c1d/imp3	2
GO:0043624	cellular protein complex disassembly	1/46	81/17011	0.19736	0.287725	0.191992	stmn1a	1
GO:0006261	DNA-dependent DNA replication	1/46	82/17011	0.199541	0.288473	0.192491	pold3	1
GO:0009063	cellular amino acid catabolic process	1/46	82/17011	0.199541	0.288473	0.192491	hgd	1
GO:1990778	protein localization to cell periphery	1/46	82/17011	0.199541	0.288473	0.192491	grip2a	1
GO:0052548	regulation of endopeptidase activity	1/46	84/17011	0.203886	0.293935	0.196135	kng1	1
GO:0006959	humoral immune response	1/46	86/17011	0.208207	0.299333	0.199738	pglyrp6	1
GO:0000209	protein polyubiquitination	1/46	88/17011	0.212505	0.304669	0.203298	peli1a	1
GO:0031401	positive regulation of protein modification process	2/46	319/17011	0.213305	0.304974	0.203501	si:ch211-261n11.7/si:dkey-23c22.9	2
GO:0005975	carbohydrate metabolic process	2/46	320/17011	0.214299	0.305553	0.203888	eno1a/gck	2
GO:0034660	ncRNA metabolic process	2/46	324/17011	0.218278	0.310374	0.207105	c1d/imp3	2
GO:0002064	epithelial cell development	1/46	92/17011	0.221033	0.312578	0.208576	gck	1
GO:0052547	regulation of peptidase activity	1/46	92/17011	0.221033	0.312578	0.208576	kng1	1
GO:0008202	steroid metabolic process	1/46	93/17011	0.223151	0.314716	0.210002	cyp51	1
GO:0006888	ER to Golgi vesicle-mediated transport	1/46	96/17011	0.229471	0.322752	0.215364	tmed10	1
GO:0033333	fin development	1/46	98/17011	0.233656	0.32775	0.2187	grip2a	1
GO:0051321	meiotic cell cycle	1/46	99/17011	0.235741	0.329783	0.220056	dmc1	1
GO:0002521	leukocyte differentiation	1/46	100/17011	0.237819	0.331796	0.221399	pglyrp6	1
GO:0003006	developmental process involved in reproduction	1/46	101/17011	0.239893	0.332899	0.222135	nanos3	1
GO:0090150	establishment of protein localization to membrane	1/46	101/17011	0.239893	0.332899	0.222135	grip2a	1
GO:0048736	appendage development	1/46	104/17011	0.246079	0.340574	0.227256	grip2a	1
GO:0016197	endosomal transport	1/46	105/17011	0.24813	0.342499	0.228541	grip2a	1
GO:0032984	protein-containing complex disassembly	1/46	107/17011	0.252217	0.346297	0.231076	stmn1a	1
GO:0042737	drug catabolic process	1/46	107/17011	0.252217	0.346297	0.231076	hgd	1
GO:0010817	regulation of hormone levels	1/46	108/17011	0.254251	0.347254	0.231714	gck	1
GO:1901617	organic hydroxy compound biosynthetic process	1/46	108/17011	0.254251	0.347254	0.231714	cyp51	1
GO:0006511	ubiquitin-dependent protein catabolic process	2/46	362/17011	0.256358	0.349212	0.233021	ubxn2a/cul5a	2
GO:0021953	central nervous system neuron differentiation	1/46	111/17011	0.260324	0.351844	0.234777	coro1a	1
GO:0048588	developmental cell growth	1/46	111/17011	0.260324	0.351844	0.234777	nanos3	1
GO:0065004	protein-DNA complex assembly	1/46	111/17011	0.260324	0.351844	0.234777	dmc1	1
GO:0046488	phosphatidylinositol metabolic process	1/46	112/17011	0.262337	0.353644	0.235978	mtmr1b	1
GO:0019941	modification-dependent protein catabolic process	2/46	371/17011	0.265419	0.356872	0.238132	ubxn2a/cul5a	2
GO:0023061	signal release	1/46	115/17011	0.268345	0.359873	0.240135	gck	1
GO:0031503	protein-containing complex localization	1/46	117/17011	0.272323	0.363527	0.242573	grip2a	1
GO:0043632	modification-dependent macromolecule catabolic process	2/46	378/17011	0.27247	0.363527	0.242573	ubxn2a/cul5a	2
GO:0008283	cell proliferation	2/46	382/17011	0.276499	0.367957	0.245528	si:ch211-261n11.7/si:dkey-23c22.9	2
GO:0006302	double-strand break repair	1/46	121/17011	0.280217	0.370058	0.24693	dmc1	1
GO:0010639	negative regulation of organelle organization	1/46	121/17011	0.280217	0.370058	0.24693	trim9	1
GO:0016050	vesicle organization	1/46	121/17011	0.280217	0.370058	0.24693	trim9	1
GO:0001932	regulation of protein phosphorylation	2/46	390/17011	0.284556	0.374834	0.250117	si:ch211-261n11.7/si:dkey-23c22.9	2
GO:0035270	endocrine system development	1/46	124/17011	0.286083	0.375891	0.250823	gck	1
GO:0006260	DNA replication	1/46	127/17011	0.291901	0.381604	0.254635	pold3	1
GO:0060627	regulation of vesicle-mediated transport	1/46	127/17011	0.291901	0.381604	0.254635	trim9	1
GO:0055123	digestive system development	1/46	131/17011	0.299587	0.390668	0.260683	leg1.1	1
GO:0009416	response to light stimulus	1/46	132/17011	0.301496	0.391191	0.261032	pold3	1
GO:0071824	protein-DNA complex subunit organization	1/46	132/17011	0.301496	0.391191	0.261032	dmc1	1
GO:0016054	organic acid catabolic process	1/46	135/17011	0.307192	0.395614	0.263983	hgd	1
GO:0043086	negative regulation of catalytic activity	1/46	135/17011	0.307192	0.395614	0.263983	kng1	1
GO:0046395	carboxylic acid catabolic process	1/46	135/17011	0.307192	0.395614	0.263983	hgd	1
GO:0032270	positive regulation of cellular protein metabolic process	2/46	414/17011	0.30868	0.39608	0.264295	si:ch211-261n11.7/si:dkey-23c22.9	2
GO:0045596	negative regulation of cell differentiation	1/46	136/17011	0.30908	0.39608	0.264295	pglyrp6	1
GO:0042325	regulation of phosphorylation	2/46	416/17011	0.310686	0.397157	0.265013	si:ch211-261n11.7/si:dkey-23c22.9	2
GO:0016049	cell growth	1/46	140/17011	0.316584	0.403702	0.269381	nanos3	1
GO:0097435	supramolecular fiber organization	2/46	424/17011	0.318697	0.405401	0.270514	coro1a/stmn1a	2
GO:0051603	proteolysis involved in cellular protein catabolic process	2/46	426/17011	0.320697	0.406948	0.271546	ubxn2a/cul5a	2
GO:0043254	regulation of protein complex assembly	1/46	143/17011	0.322159	0.407806	0.272119	trim9	1
GO:0018193	peptidyl-amino acid modification	2/46	429/17011	0.323694	0.408753	0.272751	si:ch211-261n11.7/si:dkey-23c22.9	2
GO:0044257	cellular protein catabolic process	2/46	430/17011	0.324693	0.409019	0.272928	ubxn2a/cul5a	2
GO:0001889	liver development	1/46	145/17011	0.325851	0.409483	0.273238	leg1.1	1
GO:0006417	regulation of translation	1/46	146/17011	0.32769	0.41039	0.273843	nanos3	1
GO:0022411	cellular component disassembly	1/46	147/17011	0.329523	0.41039	0.273843	stmn1a	1
GO:0051247	positive regulation of protein metabolic process	2/46	436/17011	0.330677	0.41039	0.273843	si:ch211-261n11.7/si:dkey-23c22.9	2
GO:0006066	alcohol metabolic process	1/46	148/17011	0.331352	0.41039	0.273843	cyp51	1
GO:0033043	regulation of organelle organization	2/46	437/17011	0.331673	0.41039	0.273843	trim9/stmn1a	2
GO:0006310	DNA recombination	1/46	149/17011	0.333176	0.41039	0.273843	dmc1	1
GO:0034248	regulation of cellular amide metabolic process	1/46	149/17011	0.333176	0.41039	0.273843	nanos3	1
GO:0061008	hepaticobiliary system development	1/46	149/17011	0.333176	0.41039	0.273843	leg1.1	1
GO:0000280	nuclear division	1/46	150/17011	0.334995	0.41039	0.273843	dmc1	1
GO:0030162	regulation of proteolysis	1/46	150/17011	0.334995	0.41039	0.273843	kng1	1
GO:0006914	autophagy	1/46	151/17011	0.336809	0.41039	0.273843	ubxn2a	1
GO:0061919	process utilizing autophagic mechanism	1/46	151/17011	0.336809	0.41039	0.273843	ubxn2a	1
GO:0019220	regulation of phosphate metabolic process	2/46	443/17011	0.337642	0.41039	0.273843	si:ch211-261n11.7/si:dkey-23c22.9	2
GO:0051174	regulation of phosphorus metabolic process	2/46	443/17011	0.337642	0.41039	0.273843	si:ch211-261n11.7/si:dkey-23c22.9	2
GO:0006650	glycerophospholipid metabolic process	1/46	152/17011	0.338619	0.410615	0.273993	mtmr1b	1
GO:0071804	cellular potassium ion transport	1/46	156/17011	0.345808	0.417383	0.278509	zgc:162160	1
GO:0071805	potassium ion transmembrane transport	1/46	156/17011	0.345808	0.417383	0.278509	zgc:162160	1
GO:1901605	alpha-amino acid metabolic process	1/46	157/17011	0.347594	0.418564	0.279297	hgd	1
GO:0031016	pancreas development	1/46	158/17011	0.349374	0.419735	0.280078	gck	1
GO:0030163	protein catabolic process	2/46	469/17011	0.36333	0.435492	0.290593	ubxn2a/cul5a	2
GO:0006259	DNA metabolic process	2/46	470/17011	0.364311	0.435662	0.290707	dmc1/pold3	2
GO:0044092	negative regulation of molecular function	1/46	168/17011	0.366921	0.437775	0.292116	kng1	1
GO:0009314	response to radiation	1/46	171/17011	0.372094	0.442929	0.295555	pold3	1
GO:0031399	regulation of protein modification process	2/46	480/17011	0.374096	0.444293	0.296465	si:ch211-261n11.7/si:dkey-23c22.9	2
GO:0051129	negative regulation of cellular component organization	1/46	174/17011	0.377226	0.446987	0.298263	trim9	1
GO:0048193	Golgi vesicle transport	1/46	175/17011	0.378928	0.447981	0.298926	tmed10	1
GO:0006813	potassium ion transport	1/46	176/17011	0.380625	0.448964	0.299583	zgc:162160	1
GO:0048285	organelle fission	1/46	178/17011	0.384005	0.451924	0.301558	dmc1	1
GO:0031099	regeneration	1/46	183/17011	0.392377	0.460598	0.307346	gck	1
GO:0006486	protein glycosylation	1/46	184/17011	0.394038	0.460598	0.307346	st6galnac1.2	1
GO:0043413	macromolecule glycosylation	1/46	184/17011	0.394038	0.460598	0.307346	st6galnac1.2	1
GO:0034765	regulation of ion transmembrane transport	1/46	185/17011	0.395694	0.461495	0.307944	zgc:162160	1
GO:0072657	protein localization to membrane	1/46	186/17011	0.397346	0.462383	0.308537	grip2a	1
GO:0034762	regulation of transmembrane transport	1/46	189/17011	0.402276	0.467072	0.311666	zgc:162160	1
GO:0051093	negative regulation of developmental process	1/46	193/17011	0.408788	0.473573	0.316004	pglyrp6	1
GO:0044282	small molecule catabolic process	1/46	194/17011	0.410405	0.474388	0.316547	hgd	1
GO:0046486	glycerolipid metabolic process	1/46	197/17011	0.41523	0.478899	0.319557	mtmr1b	1
GO:1901615	organic hydroxy compound metabolic process	1/46	198/17011	0.41683	0.479678	0.320077	cyp51	1
GO:0042060	wound healing	1/46	201/17011	0.421604	0.483029	0.322314	f13a1a.1	1
GO:0051241	negative regulation of multicellular organismal process	1/46	201/17011	0.421604	0.483029	0.322314	pglyrp6	1
GO:1904888	cranial skeletal system development	1/46	205/17011	0.427909	0.489174	0.326414	kng1	1
GO:0032269	negative regulation of cellular protein metabolic process	1/46	215/17011	0.443381	0.505747	0.337472	kng1	1
GO:0006644	phospholipid metabolic process	1/46	216/17011	0.444905	0.506372	0.33789	mtmr1b	1
GO:0051248	negative regulation of protein metabolic process	1/46	221/17011	0.452466	0.513851	0.34288	kng1	1
GO:0006520	cellular amino acid metabolic process	1/46	225/17011	0.458443	0.519502	0.346651	hgd	1
GO:0043269	regulation of ion transport	1/46	226/17011	0.459927	0.520048	0.347015	zgc:162160	1
GO:0030855	epithelial cell differentiation	1/46	229/17011	0.464355	0.523914	0.349595	gck	1
GO:0044087	regulation of cellular component biogenesis	1/46	232/17011	0.468748	0.527723	0.352136	trim9	1
GO:0016311	dephosphorylation	1/46	235/17011	0.473106	0.531476	0.354641	mtmr1b	1
GO:0009101	glycoprotein biosynthetic process	1/46	236/17011	0.47455	0.531947	0.354955	st6galnac1.2	1
GO:0051493	regulation of cytoskeleton organization	1/46	241/17011	0.481716	0.538816	0.359539	stmn1a	1
GO:0009611	response to wounding	1/46	247/17011	0.490189	0.547114	0.365076	f13a1a.1	1
GO:0048732	gland development	1/46	249/17011	0.492983	0.549052	0.366369	leg1.1	1
GO:0000165	MAPK cascade	1/46	252/17011	0.497146	0.552503	0.368671	braf	1
GO:0007015	actin filament organization	1/46	265/17011	0.514803	0.570903	0.380949	coro1a	1
GO:0009100	glycoprotein metabolic process	1/46	273/17011	0.525365	0.580138	0.387111	st6galnac1.2	1
GO:0010608	posttranscriptional regulation of gene expression	1/46	273/17011	0.525365	0.580138	0.387111	nanos3	1
GO:0023014	signal transduction by protein phosphorylation	1/46	278/17011	0.531853	0.586054	0.391059	braf	1
GO:0051336	regulation of hydrolase activity	1/46	281/17011	0.535703	0.589046	0.393056	kng1	1
GO:0008610	lipid biosynthetic process	1/46	288/17011	0.544568	0.597528	0.398715	cyp51	1
GO:0055082	cellular chemical homeostasis	1/46	289/17011	0.54582	0.597639	0.398789	gck	1
GO:0015672	monovalent inorganic cation transport	1/46	305/17011	0.565412	0.617787	0.412234	zgc:162160	1
GO:0000226	microtubule cytoskeleton organization	1/46	314/17011	0.576066	0.628106	0.419119	stmn1a	1
GO:0016567	protein ubiquitination	1/46	323/17011	0.586465	0.638104	0.425791	peli1a	1
GO:0007265	Ras protein signal transduction	1/46	336/17011	0.601046	0.651238	0.434555	zgc:162879	1
GO:0098657	import into cell	1/46	336/17011	0.601046	0.651238	0.434555	zgc:162160	1
GO:0048589	developmental growth	1/46	347/17011	0.61299	0.662796	0.442267	nanos3	1
GO:0032446	protein modification by small protein conjugation	1/46	354/17011	0.620408	0.669422	0.446689	peli1a	1
GO:0009628	response to abiotic stimulus	1/46	357/17011	0.623545	0.67141	0.448015	pold3	1
GO:0007409	axonogenesis	1/46	368/17011	0.634829	0.680736	0.454238	coro1a	1
GO:0044093	positive regulation of molecular function	1/46	368/17011	0.634829	0.680736	0.454238	pprc1	1
GO:0040007	growth	1/46	377/17011	0.643815	0.688949	0.459718	nanos3	1
GO:0019725	cellular homeostasis	1/46	391/17011	0.657365	0.702001	0.468428	gck	1
GO:0061564	axon development	1/46	395/17011	0.661143	0.70414	0.469855	coro1a	1
GO:0048667	cell morphogenesis involved in neuron differentiation	1/46	396/17011	0.662081	0.70414	0.469855	coro1a	1
GO:0098662	inorganic cation transmembrane transport	1/46	398/17011	0.66395	0.704683	0.470217	zgc:162160	1
GO:0045944	positive regulation of transcription by RNA polymerase II	1/46	402/17011	0.667657	0.707171	0.471878	pprc1	1
GO:0007264	small GTPase mediated signal transduction	1/46	405/17011	0.670411	0.708642	0.472859	zgc:162879	1
GO:0048585	negative regulation of response to stimulus	1/46	409/17011	0.674048	0.711038	0.474458	pglyrp6	1
GO:0048812	neuron projection morphogenesis	1/46	420/17011	0.683849	0.717005	0.47844	coro1a	1
GO:0048858	cell projection morphogenesis	1/46	420/17011	0.683849	0.717005	0.47844	coro1a	1
GO:0120039	plasma membrane bounded cell projection morphogenesis	1/46	420/17011	0.683849	0.717005	0.47844	coro1a	1
GO:0032990	cell part morphogenesis	1/46	426/17011	0.689073	0.719575	0.480154	coro1a	1
GO:0098660	inorganic ion transmembrane transport	1/46	426/17011	0.689073	0.719575	0.480154	zgc:162160	1
GO:0048878	chemical homeostasis	1/46	433/17011	0.69506	0.723227	0.482591	gck	1
GO:0006412	translation	1/46	435/17011	0.69675	0.723227	0.482591	nanos3	1
GO:0051726	regulation of cell cycle	1/46	435/17011	0.69675	0.723227	0.482591	trim36	1
GO:0098655	cation transmembrane transport	1/46	438/17011	0.699268	0.724391	0.483368	zgc:162160	1
GO:0043043	peptide biosynthetic process	1/46	440/17011	0.700935	0.724672	0.483556	nanos3	1
GO:0001654	eye development	1/46	445/17011	0.705064	0.726048	0.484474	coro1a	1
GO:0150063	visual system development	1/46	445/17011	0.705064	0.726048	0.484474	coro1a	1
GO:0070647	protein modification by small protein conjugation or removal	1/46	450/17011	0.709136	0.727572	0.485491	peli1a	1
GO:0010647	positive regulation of cell communication	1/46	451/17011	0.709944	0.727572	0.485491	gck	1
GO:0023056	positive regulation of signaling	1/46	452/17011	0.71075	0.727572	0.485491	gck	1
GO:0030097	hemopoiesis	1/46	455/17011	0.713154	0.728596	0.486174	pglyrp6	1
GO:0030001	metal ion transport	1/46	460/17011	0.717117	0.730572	0.487493	zgc:162160	1
GO:0007420	brain development	1/46	461/17011	0.717904	0.730572	0.487493	coro1a	1
GO:0000904	cell morphogenesis involved in differentiation	1/46	466/17011	0.721803	0.731027	0.487796	coro1a	1
GO:0007017	microtubule-based process	1/46	467/17011	0.722576	0.731027	0.487796	stmn1a	1
GO:0048534	hematopoietic or lymphoid organ development	1/46	467/17011	0.722576	0.731027	0.487796	pglyrp6	1
GO:0045595	regulation of cell differentiation	1/46	471/17011	0.725649	0.732164	0.488555	pglyrp6	1
GO:0002520	immune system development	1/46	473/17011	0.727173	0.732164	0.488555	pglyrp6	1
GO:0022402	cell cycle process	1/46	474/17011	0.727932	0.732164	0.488555	dmc1	1
GO:0030036	actin cytoskeleton organization	1/46	480/17011	0.732442	0.735275	0.490631	coro1a	1
GO:0060322	head development	1/46	487/17011	0.737611	0.739035	0.49314	coro1a	1
GO:0030029	actin filament-based process	1/46	492/17011	0.741243	0.741243	0.494613	coro1a	1
